# Supplementary material for: Arctic Holocene proxy climate database – new approaches to assessing geochronological accuracy and encoding climate variables
Source: Copernicus journal article supplement (doi:10.5194/cp-10-1605-2014), 2014-08-29
Supplement: Supplementary file 1 [file cp-10-1605-2014-supplement.zip]

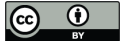

## *Supplement of*

# **Arctic Holocene proxy climate database – new approaches to assessing geochronological accuracy and encoding climate variables**

**H. S. Sundqvist et al.**

*Correspondence to:* D. S. Kaufman (darrell.kaufman@nau.edu)

- Supplement-Cover-Letter.pdf
- \_\_MACOSX
  - supplement v.2.0
    - \* .\_DS\_Store
    - \* .\_Alaska and Yukon v2.0.xls
    - \* .\_Canadian islands and Greenland v2.0.xls
    - \* .\_Fennoscandia v2.0.xls
    - \* .\_Mainland Canada v2.0.xls
    - \* .\_North Atlantic and Iceland v2.0.xls
    - \* .\_Russian Arctic v2.0.xls
    - \* .\_Tables\_1\_2\_S1 v. 2.0.xlsx
- supplement v.2.0
  - .DS\_Store
  - Alaska and Yukon v2.0.xls
  - Canadian islands and Greenland v2.0.xls
  - Fennoscandia v2.0.xls
  - Mainland Canada v2.0.xls
  - North Atlantic and Iceland v2.0.xls
  - Russian Arctic v2.0.xls
  - Tables\_1\_2\_S1 v. 2.0.xlsx
